# Supplementary material for: Persistence and evolution of Pseudomonas aeruginosa following initiation of highly effective modulator therapy in cystic fibrosis
Source: PubMed Central journal article supplement (PMC11077959; doi:10.1128/mbio.00519-24), 2024-04-02

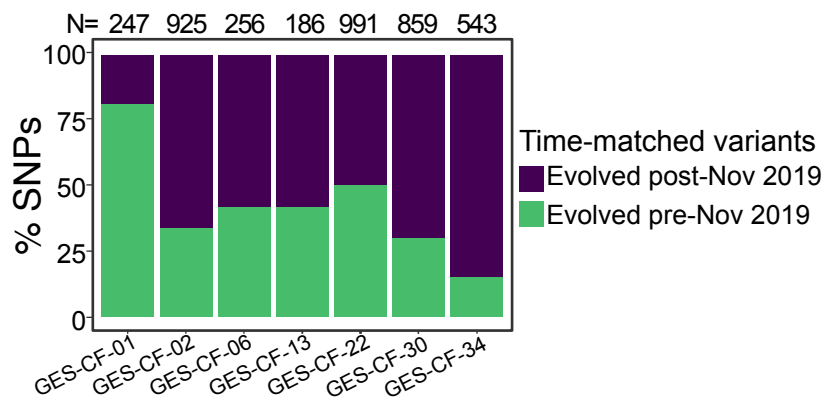

Supplement: mbio.00519-24-s0001.pdf [file mbio.00519-24-s0001.pdf]
